# Supplementary material for: Sepsis Recognition and Management in Critically Ill Patients: ICU Nurses' Perspective
Source: Research Square preprint supplement (doi:10.21203/rs.3.rs-6415969/v1), 2025-07-31
Supplement: Supplementary file 1 [file 3960ac773b92f98176049d6d.docx]

# Qualitative Interview Guide: ICU Nurses’ Perspectives on Sepsis Recognition and Management

Purpose: To explore ICU nurses' experiences, attitudes, and practices in recognising and managing sepsis in critically ill patients, based on themes and sub-themes from prior data.

## Introduction

Greeting & Rapport was established

- • Thank you for participating.
- • Introduce ourselves and the study’s aim.
- • Assured confidentiality and sought consent to record.

Warm-up Questions

- Please share your ICU nursing background and current role.
- How many years have you worked in critical care?

## Main Questions

- What does sepsis mean to you in your ICU practice?
- How would you define septic shock, and how does it differ from sepsis?
- What key signs and symptoms prompt you to suspect sepsis in a critically ill patient?
- How do you distinguish between general infection signs and sepsis/septic shock indicators?
- Based on your experience, how does a septic patient typically present in the ICU?
- How confident are you in recognising sepsis from clinical signs alone?
- Describe a situation where your assessment led you to suspect or confirm sepsis.
- Which assessment tools or clinical cues do you most rely on, and why?
- What sepsis management protocols or guidelines exist in your unit?
- How often do you refer to the Surviving Sepsis Campaign guidelines?
- Have you received formal training on sepsis identification and management?
- How important do you believe ongoing sepsis education is for ICU nurses?
- When sepsis recognition is delayed, what factors contribute to that delay?
- Has your team conducted root-cause analyses after sepsis-related events? What did you learn?
- What preventive steps does your unit take to reduce sepsis risk?
- How do you ensure infection control in daily care?
- Once sepsis is diagnosed, what immediate interventions do you initiate?
- Can you share a case where prompt intervention resulted in a positive patient outcome?
- Which medications do you commonly administer for sepsis?
- How do you evaluate the effectiveness of these medications?
- What additional training or resources would enhance your sepsis management?
- Have you observed improvements in care after receiving sepsis-specific education?
- How does collaboration with the lab influence your sepsis management?
- Have delayed lab results ever impacted patient outcomes?
- How does staffing level affect your ability to monitor and intervene early?
- Have workload pressures ever prevented timely action on a sepsis case?
- In your view, how do invasive devices contribute to sepsis development?
- What practices are in place to minimise sepsis risks from invasive procedures?
- Is there anything else you’d like to share about recognising or managing sepsis?

Thank you and outline any follow-up or how findings will be used.
